# Supplementary material for: Morphology-based radiomics signature: a novel determinant to identify multiple intracranial aneurysms rupture
Source: publisher site journal article supplement (doi:10.18632/aging.203001), 2021-05-10
Supplement: Supplementary file [file aging-v13i9-203001-supplementary-material-SD1.pdf]

## SUPPLEMENTARY TABLES

**Supplementary Table 1. Major packages of R software used in this study.**

| Functions                                                                        | R package         |
|----------------------------------------------------------------------------------|-------------------|
| logistic regression analysis                                                     | glm               |
| Plot the receiver operating curve (ROC) and measure the area under the ROC (AUC) | pROC              |
| Hosmer and Lemeshow goodness of fit (GOF) test                                   | ResourceSelection |
| Plot bar diagrams                                                                | ggplot2           |
| Plot calibration curves, Brier score and develop nomogram                        | rms               |
| Decision curve analysis (DCA)                                                    | rmda              |

**Supplementary Table 2. Demographic and clinical features of the whole cohort.**

|                | Whole cohort   |
|----------------|----------------|
| Age            | 58.5 (31 - 85) |
| Female         | 75 (71.4%)     |
| Hypertension   | 64 (61.9%)     |
| Hyperlipidemia | 12(11.4%)      |
| Diabetes       | 11(10.5%)      |
| Heart disease  | 13 (12.4)      |
| Smoking        | 26 (24.8%)     |
| Drinking       | 22 (21.0%)     |

**Supplementary Table 3. Stratified analysis of the association between the morphology-based radiomics signature and aneurysm rupture in the whole population.**

| Locations                | Radiomics signature |                   | P - value |
|--------------------------|---------------------|-------------------|-----------|
|                          | Unruptured aneurysm | Ruptured aneurysm |           |
| Internal carotid artery  | -1.032(1.061)       | 0.737(2.080)      | <0.001    |
| Anterior cerebral artery | -1.433(0.807)       | 0.542 (1.560)     | <0.001    |
| Middle cerebral artery   | -0.979(0.822)       | 0.451(1.208)      | <0.001    |
| Posterior circulation    | -0.863(1.720)       | 0.239(1.221)      | 0.023     |
